# Supplementary material for: Germylene stabilized group 12 metal complexes and their reactivity with chalcogens
Source: Royal Society of Chemistry journal article supplement (doi:10.1039/c8dt04589e), 2019-01-01
Supplement: c8dt04589e1.pdf [file c8dt04589e1.pdf]

*Supporting Information*

**Germylene Stabilized Group 12 Metal Complexes and their  
Reactivity with Chalcogens**

Soumen Sinhababu,<sup>[a][†]</sup> Mahendra Kumar Sharma,<sup>[a][†]</sup> Pritam Mahawar,<sup>[a][†]</sup>  
Supreet Kaur,<sup>[a][†]</sup> Vivek Kumar Singh,<sup>[a]</sup> Akhil Paliwal,<sup>[a]</sup> Dharendra Yadav,<sup>[a]</sup>  
Hemant K. Kashyap<sup>[a]</sup> and Selvarajan Nagendran\*<sup>[a]</sup>

<sup>a</sup>Department of Chemistry, Indian Institute of Technology Delhi, Hauz Khas, New Delhi  
110016, India

## CONTENTS

|           |                                                                                                                                                                                           | Page no. |
|-----------|-------------------------------------------------------------------------------------------------------------------------------------------------------------------------------------------|----------|
| Table S1  | Crystal data and structure refinement for compounds <b>2</b> , <b>3</b> , <b>5</b> , and <b>6</b> ,                                                                                       | 3        |
| Table S2  | Crystal data and structure refinement for compounds <b>7</b> and <b>9</b>                                                                                                                 | 5        |
|           | Computational details                                                                                                                                                                     | 7        |
| Figure S1 | Optimized geometries of (a) compound <b>3</b> and (b) compound <b>7</b>                                                                                                                   | 7        |
| Table S3  | Comparison of the important bond angles and lengths in compounds <b>3</b> and <b>7</b> obtained from experimental studies with the corresponding values calculated using DFT calculations | 8        |
| Table S4  | WBI of Ge-Cd and Cd-I bonds in compounds <b>3</b> and <b>7</b>                                                                                                                            | 10       |
| Figure S2 | NBO diagrams of compound <b>7</b>                                                                                                                                                         | 11       |
| Figure S3 | NBO diagrams of compound <b>3</b>                                                                                                                                                         | 12       |
| Figure S4 | Energy level diagrams for the donor-acceptor interactions in (a) compound <b>3</b> and (b) compound <b>7</b>                                                                              | 13       |
| Table S5  | NPA charges on germanium, cadmium, and iodine atoms in compounds <b>3</b> and <b>7</b>                                                                                                    | 14       |
| Figure S5 | The LUMOs of (a) compounds <b>3</b> and (b) compound <b>7</b>                                                                                                                             | 15       |
| Figure S6 | Energy level diagram that shows the HOMO and LUMO energies of compounds <b>3</b> and <b>7</b> .                                                                                           | 15       |
|           | Coordinates for the optimized geometries of compounds <b>3</b> and <b>7</b>                                                                                                               | 16       |
|           | References                                                                                                                                                                                | 26       |

**Table S1. Crystal data and structure refinement for compounds 2, 3, 5, and 6**

|                                                        | <b>2</b>                                                                                            | <b>3</b>                                                                        | <b>5</b>                                                                                      | <b>6</b>                                                                                              |
|--------------------------------------------------------|-----------------------------------------------------------------------------------------------------|---------------------------------------------------------------------------------|-----------------------------------------------------------------------------------------------|-------------------------------------------------------------------------------------------------------|
| Empirical formula                                      | C <sub>36</sub> H <sub>60</sub> Ge <sub>2</sub> ZnCl <sub>2</sub> N <sub>4</sub>                    | C <sub>36</sub> H <sub>60</sub> Ge <sub>2</sub> CdI <sub>2</sub> N <sub>4</sub> | C <sub>36</sub> H <sub>60</sub> Ge <sub>2</sub> I <sub>4</sub> N <sub>4</sub> Zn <sub>2</sub> | C <sub>38</sub> H <sub>62</sub> Cd <sub>2</sub> Cl <sub>8</sub> Ge <sub>2</sub> N <sub>4</sub>        |
| Formula weight                                         | 830.39                                                                                              | 1060.31                                                                         | 1332.00                                                                                       | 1228.56                                                                                               |
| Temperature, K                                         | 200(2)                                                                                              | 150(2)                                                                          | 304(2)                                                                                        | 302.11                                                                                                |
| Wavelength, Å                                          | 0.71073                                                                                             | 0.71073                                                                         | 0.71073                                                                                       | 0.71073                                                                                               |
| Crystal system                                         | Monoclinic                                                                                          | Orthorhombic                                                                    | Orthorhombic                                                                                  | Monoclinic                                                                                            |
| Space group                                            | <i>P2<sub>1</sub>/n</i>                                                                             | <i>Pbca</i>                                                                     | <i>Pbca</i>                                                                                   | <i>P2<sub>1</sub>/n</i>                                                                               |
| Unit cell dimensions                                   | <i>a</i> = 12.144(4) Å<br><i>b</i> = 24.530(8) Å<br><i>c</i> = 13.845(4) Å<br><i>β</i> = 96.653(7)° | <i>a</i> = 17.8395(18) Å<br><i>b</i> = 19.3485(19) Å<br><i>c</i> = 24.563(2) Å  | <i>a</i> = 18.971(3) Å<br><i>b</i> = 13.241(19) Å<br><i>c</i> = 21.886(4) Å                   | <i>a</i> = 12.595(9) Å<br><i>b</i> = 14.996(1) Å<br><i>c</i> = 14.499(10) Å<br><i>β</i> = 106.891(2)° |
| Volume, Å <sup>3</sup>                                 | 4097(2)                                                                                             | 8478.5(14)                                                                      | 5497.6(15)                                                                                    | 2620.5(3)                                                                                             |
| <i>Z</i>                                               | 4                                                                                                   | 8                                                                               | 4                                                                                             | 2                                                                                                     |
| Density (calculated),<br>Mg/m <sup>3</sup>             | 1.346                                                                                               | 1.661                                                                           | 1.609                                                                                         | 1.557                                                                                                 |
| Absorption coefficient,<br>mm <sup>-1</sup>            | 2.197                                                                                               | 3.390                                                                           | 4.215                                                                                         | 2.373                                                                                                 |
| <i>F</i> (000)                                         | 1728.0                                                                                              | 4176.0                                                                          | 2559                                                                                          | 1228.1                                                                                                |
| Crystal size, mm <sup>3</sup>                          | 0.470 x 0.260 x 0.130                                                                               | 0.510 x 0.260 x 0.140                                                           | 0.35 x 0.26 x 0.16                                                                            | 0.28 x 0.21 x 0.18                                                                                    |
| <i>θ</i> range for data<br>collection, °               | 4.08 to 25.03                                                                                       | 1.66 to 25.00                                                                   | 5.282 to 49.962                                                                               | 4 to 50                                                                                               |
| Limiting indices                                       | -13 ≤ <i>h</i> ≤ 14,<br>-29 ≤ <i>k</i> ≤ 29,<br>-12 ≤ <i>l</i> ≤ 16                                 | -19 ≤ <i>h</i> ≤ 21,<br>-23 ≤ <i>k</i> ≤ 23,<br>-23 ≤ <i>l</i> ≤ 29             | -22 ≤ <i>h</i> ≤ 22,<br>-15 ≤ <i>k</i> ≤ 15,<br>-25 ≤ <i>l</i> ≤ 25                           | -16 ≤ <i>h</i> ≤ 16,<br>-20 ≤ <i>k</i> ≤ 20,<br>-19 ≤ <i>l</i> ≤ 19                                   |
| Reflections collected                                  | 21214                                                                                               | 42740                                                                           | 37727                                                                                         | 46679                                                                                                 |
| Independent reflections                                | 7170 [ <i>R</i> <sub>int</sub> = 0.0836]                                                            | 7462 [ <i>R</i> <sub>int</sub> = 0.0570]                                        | 4834 [ <i>R</i> <sub>int</sub> = 0.1657]                                                      | 3915 [ <i>R</i> <sub>int</sub> = 0.0779]                                                              |
| Absorption correction                                  | Semi-empirical from<br>equivalents                                                                  | Semi-empirical from<br>equivalents                                              | Semi-empirical from<br>equivalents                                                            | Semi-empirical from<br>equivalents                                                                    |
| Refinement method                                      | Full-matrix least-squares<br>on <i>F</i> <sup>2</sup>                                               | Full-matrix least-squares<br>on <i>F</i> <sup>2</sup>                           | Full-matrix least-squares<br>on <i>F</i> <sup>2</sup>                                         | Full-matrix least-squares<br>on <i>F</i> <sup>2</sup>                                                 |
| Data / restraints /<br>parameters                      | 7170 / 0 / 424                                                                                      | 7462 / 22 / 412                                                                 | 4834 / 0 / 224                                                                                | 3915 / 0 / 260                                                                                        |
| Goodness-of-fit on <i>F</i> <sup>2</sup>               | 1.155                                                                                               | 1.033                                                                           | 1.046                                                                                         | 1.032                                                                                                 |
| Final <i>R</i> indices<br>[ <i>I</i> > 2σ( <i>I</i> )] | <i>R</i> <sub>1</sub> = 0.0994,<br><i>wR</i> <sub>2</sub> = 0.2577                                  | <i>R</i> <sub>1</sub> = 0.0544,<br><i>wR</i> <sub>2</sub> = 0.1411              | <i>R</i> <sub>1</sub> = 0.0592<br><i>wR</i> <sub>2</sub> = 0.1517                             | <i>R</i> <sub>1</sub> = 0.0385,<br><i>wR</i> <sub>2</sub> = 0.0837                                    |

|                                                    |                                    |                                    |                                    |                                    |
|----------------------------------------------------|------------------------------------|------------------------------------|------------------------------------|------------------------------------|
| <i>R</i> indices (all data)                        | $R_1 = 0.1289,$<br>$wR_2 = 0.2711$ | $R_1 = 0.0755,$<br>$wR_2 = 0.1530$ | $R_1 = 0.0752,$<br>$wR_2 = 0.1688$ | $R_1 = 0.0543,$<br>$wR_2 = 0.0880$ |
| Largest diff. peak and<br>hole, $e\text{\AA}^{-3}$ | 1.979 and -0.776                   | 1.991 and -1.408                   | 0.92 and -0.64                     | 0.78 and -0.69                     |

**Table S2. Crystal data and structure refinement for compounds 7 and 9.**

|                                          | <b>7</b>                                                                                                | <b>9</b>                                                                                                                                              |
|------------------------------------------|---------------------------------------------------------------------------------------------------------|-------------------------------------------------------------------------------------------------------------------------------------------------------|
| Empirical formula                        | C <sub>36</sub> H <sub>60</sub> Ge <sub>2</sub> Cd <sub>2</sub> I <sub>4</sub> N <sub>4</sub>           | C <sub>36</sub> H <sub>60</sub> Cl <sub>4</sub> Ge <sub>2</sub> N <sub>4</sub> Se <sub>2</sub> Zn <sub>2</sub>                                        |
| Formula weight                           | 1426.52                                                                                                 | 1124.60                                                                                                                                               |
| Temperature, K                           | 100(2)                                                                                                  | 150(2)                                                                                                                                                |
| Wavelength, Å                            | 0.71073                                                                                                 | 0.71073                                                                                                                                               |
| Crystal system                           | Monoclinic                                                                                              | Triclinic                                                                                                                                             |
| Space group                              | <i>P</i> 2 <sub>1</sub> / <i>n</i>                                                                      | <i>P</i> -1                                                                                                                                           |
| Unit cell dimensions                     | <i>a</i> = 9.1533(15) Å<br><i>b</i> = 26.486(5) Å<br><i>c</i> = 10.1617(17) Å<br><i>β</i> = 106.896(3)° | <i>a</i> = 10.268(2) Å<br><i>b</i> = 11.193(2) Å<br><i>c</i> = 12.837(3) Å<br><i>α</i> = 87.685(4)°<br><i>β</i> = 79.561(5)°<br><i>γ</i> = 75.846(5)° |
| Volume, Å <sup>3</sup>                   | 2357.2(7)                                                                                               | 1406.9(5)                                                                                                                                             |
| <i>Z</i>                                 | 2                                                                                                       | 1                                                                                                                                                     |
| Density (calculated), Mg/m <sup>3</sup>  | 2.010                                                                                                   | 1.327                                                                                                                                                 |
| Absorption coefficient, mm <sup>-1</sup> | 4.800                                                                                                   | 3.408                                                                                                                                                 |
| <i>F</i> (000)                           | 1352.0                                                                                                  | 564.0                                                                                                                                                 |
| Crystal size, mm <sup>3</sup>            | 0.430 x 0.210 x 0.120                                                                                   | 0.3 × 0.25 × 0.15                                                                                                                                     |
| 2 $\theta$ range for data collection, °  | 1.54 to 25.00                                                                                           | 1.88 to 25.00                                                                                                                                         |
| Limiting indices                         | -10 ≤ <i>h</i> ≤ 9,<br>-31 ≤ <i>k</i> ≤ 31,<br>-8 ≤ <i>l</i> ≤ 12                                       | -7 ≤ <i>h</i> ≤ 12,<br>-13 ≤ <i>k</i> ≤ 13,<br>-14 ≤ <i>l</i> ≤ 15                                                                                    |
| Reflections collected                    | 12266                                                                                                   | 7145                                                                                                                                                  |
| Independent reflections                  | 4139 [ <i>R</i> <sub>int</sub> = 0.0485]                                                                | 4874 [ <i>R</i> <sub>int</sub> = 0.0645]                                                                                                              |
| Absorption correction                    | Semi-empirical from equivalents                                                                         | Semi-empirical from equivalents                                                                                                                       |

| Refinement method                               | Full-matrix least-squares on $F^2$ | Full-matrix least-squares on $F^2$ |
|-------------------------------------------------|------------------------------------|------------------------------------|
| Data / restraints / parameters                  | 4146 / 0 / 223                     | 4874 / 0 / 226                     |
| Goodness-of-fit on $F^2$                        | 1.027                              | 0.918                              |
| Final $R$ indices [ $I > 2\sigma(I)$ ]          | $R_1 = 0.0343,$<br>$wR_2 = 0.0744$ | $R_1 = 0.0807,$<br>$wR_2 = 0.1692$ |
| $R$ indices (all data)                          | $R_1 = 0.0479,$<br>$wR_2 = 0.0912$ | $R_1 = 0.1328,$<br>$wR_2 = 0.1871$ |
| Largest diff. peak and hole, $e\text{\AA}^{-3}$ | 1.099 and -0.720                   | 1.01 and -0.76                     |

## Computational details.

Theoretical calculations were performed using Gaussian 09 package.<sup>S1</sup> For geometry optimizations the coordinates obtained from single crystal X-ray diffraction studies on compounds **3** and **7** were used. The initial structures of compounds **3** and **7** were optimized using Hartree Fock (HF) level of theory utilizing LANL2DZ basis set for germanium, cadmium, and iodine atoms and 6-31+G\*\* basis set for the rest of the atoms. The energy minimized geometries obtained were further optimized at Becke-3-parameter-Lee-Yang-Parr (B3LYP) level of theory using the aforementioned basis sets. The frequency calculations were also carried out on all the optimized geometries and the corresponding stationary minima were characterized. Natural bond orbital (NBO) analysis was performed using B3LYP theory level and split basis set used in the geometry optimizations.<sup>S2</sup> Natural population analysis (NPA) was performed by employing NBO 3.1 program incorporated in Gaussian program package. Gauss view and Chemcraft (<http://www.chemcraftprog.com>) were used for visualization and rendering.<sup>S3</sup> The optimized structures are shown in Figure S1 and a comparison of the optimized bond distances and bond angles with the corresponding experimental values is provided in Table S3.

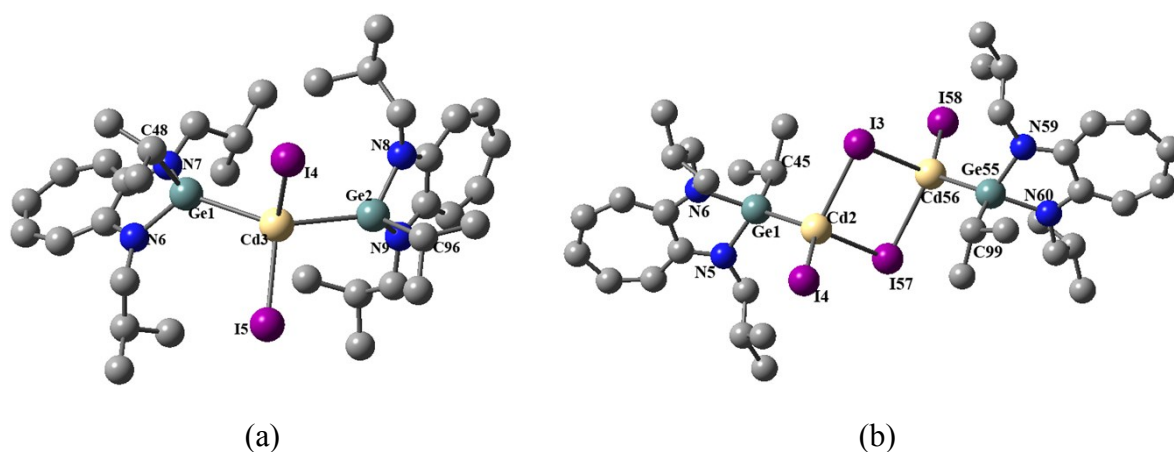

**Figure S1. Optimized geometries of (a) compound 3 and (b) compound 7.** Hydrogen atoms are not shown for clarity.

**Table S3. Comparison of the important bond angles and lengths in compounds 3 and 7 obtained from experimental studies with the corresponding values calculated using DFT calculations.**

| Parameter labels used in theoretical studies | Corresponding parameter labels in the CIF file | Bond angles (°)/lengths (Å) |                      |
|----------------------------------------------|------------------------------------------------|-----------------------------|----------------------|
|                                              |                                                | Calculated through DFT      | Observed through CIF |
| <b>Compound 3</b>                            |                                                |                             |                      |
| Ge1-Cd3                                      | Ge1-Cd1                                        | 2.846                       | 2.622(1)             |
| Ge2-Cd3                                      | Ge2-Cd1                                        | 2.896                       | 2.655(1)             |
| Cd3-I4                                       | Cd1-I1                                         | 2.884                       | 2.824(8)             |
| Cd3-I5                                       | Cd1-I2                                         | 2.911                       | 2.871(8)             |
| Ge1-C48                                      | Ge1-C16                                        | 2.041                       | 2.006(1)             |
| Ge2-C96                                      | Ge2-C34                                        | 2.040                       | 1.996(9)             |
| Ge1-N6                                       | Ge1-N1                                         | 1.973                       | 1.912(8)             |
| Ge1-N7                                       | Ge1-N2                                         | 1.973                       | 1.927(6)             |
| Ge2-N8                                       | Ge2-N3                                         | 1.971                       | 1.913(7)             |
| Ge2-N9                                       | Ge2-N4                                         | 1.984                       | 1.931(6)             |
| Ge1-Cd3-I4                                   | Ge1-Cd1-I1                                     | 103.96                      | 107.45(3)            |
| Ge2-Cd3-I5                                   | Ge2-Cd1-I2                                     | 101.52                      | 107.87(3)            |
| Ge1-Cd3-Ge2                                  | Ge1-Cd1-Ge2                                    | 132.47                      | 126.08(3)            |
| Ge1-Cd3-I5                                   | Ge1-Cd1-I2                                     | 94.47                       | 95.50(3)             |
| Ge2-Cd3-I4                                   | Ge2-Cd1-I1                                     | 106.87                      | 112.13(3)            |
| I4-Cd3-I5                                    | I1-Cd1-I2                                      | 118.32                      | 104.69(2)            |
| C96-Ge2-Cd3                                  | C34-Ge2-Cd1                                    | 110.07                      | 114.20(3)            |
| C48-Ge1-Cd3                                  | C16-Ge1-Cd1                                    | 114.60                      | 119.90(3)            |
| N6-Ge1-N7                                    | N1-Ge1-N2                                      | 80.62                       | 82.10(3)             |
| N8-Ge2-N9                                    | N3-Ge2-N4                                      | 80.26                       | 81.70(3)             |



| Compound 7  |             |        |           |
|-------------|-------------|--------|-----------|
| Ge1-Cd2     | Ge1-Cd1     | 2.791  | 2.585(9)  |
| Cd2-I3      | Cd1-I2      | 3.032  | 2.703(7)  |
| Cd2-I57     | Cd1-I1      | 3.069  | 2.869(7)  |
| Cd2-I4      | Cd1-I1*     | 2.802  | 2.933(7)  |
| Ge1-C45     | Ge1-C16     | 2.030  | 1.988(6)  |
| Ge1-N5      | Ge1-N1      | 1.957  | 1.913(5)  |
| Ge1-N6      | Ge1-N2      | 1.958  | 1.910(5)  |
| N5-Ge1-N6   | N2-Ge1-N1   | 81.41  | 82.30(2)  |
| C45-Ge1-Cd2 | C16-Ge1-Cd1 | 119.82 | 117.46(2) |
| Ge1-Cd2-I57 | Ge1-Cd1-I2  | 96.36  | 133.29(3) |
| Ge1-Cd2-I3  | Ge1-Cd1-I1  | 104.58 | 108.23(3) |
| I57-Cd2-I3  | I2-Cd1-I1   | 94.59  | 105.83(2) |
| Ge1-Cd2-I4  | Ge1-Cd1-I1* | 127.28 | 95.64(2)  |
| I4-Cd2-I57  | I1-Cd1-I1*  | 115.34 | 99.61(2)  |
| Cd2-I3-Cd56 | Cd1-I1-Cd1* | 85.41  | 80.39(2)  |

\*Symmetry transformation used to generate the equivalent atoms: -x, -y, -z+1.

**Table S4. Wiberg bond index (WBI) of Ge-Cd and Cd-I bonds in compounds 3 and 7.**

| <b>Compound</b> | <b>Bond type</b> | <b>WBI</b> |
|-----------------|------------------|------------|
| Compound 3      | Ge1/2-Cd3        | 0.51       |
|                 | Cd3-I4           | 0.52       |
|                 | Cd3-I5           | 0.55       |
| Compound 7      | Ge1/55-Cd2/56    | 0.54       |
|                 | Cd2/56-I4/58     | 0.71       |
|                 | Cd2/56-I3/57     | 0.39       |
|                 | Cd2/56-I57/3     | 0.36       |

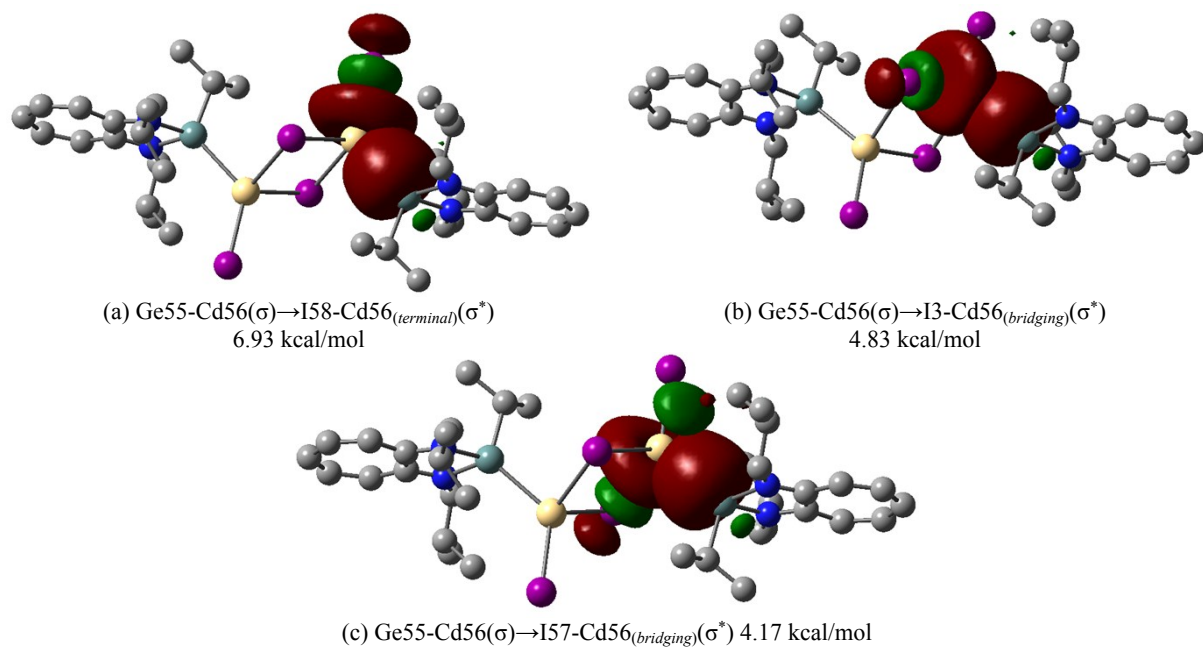

**Figure S2. NBO diagrams of compound 7.** Donor-acceptor interactions between Ge55-Cd56 bonding orbital and terminal and bridging I58/3/57-Cd56 antibonding orbitals are shown. Hydrogen atoms are omitted for clarity.

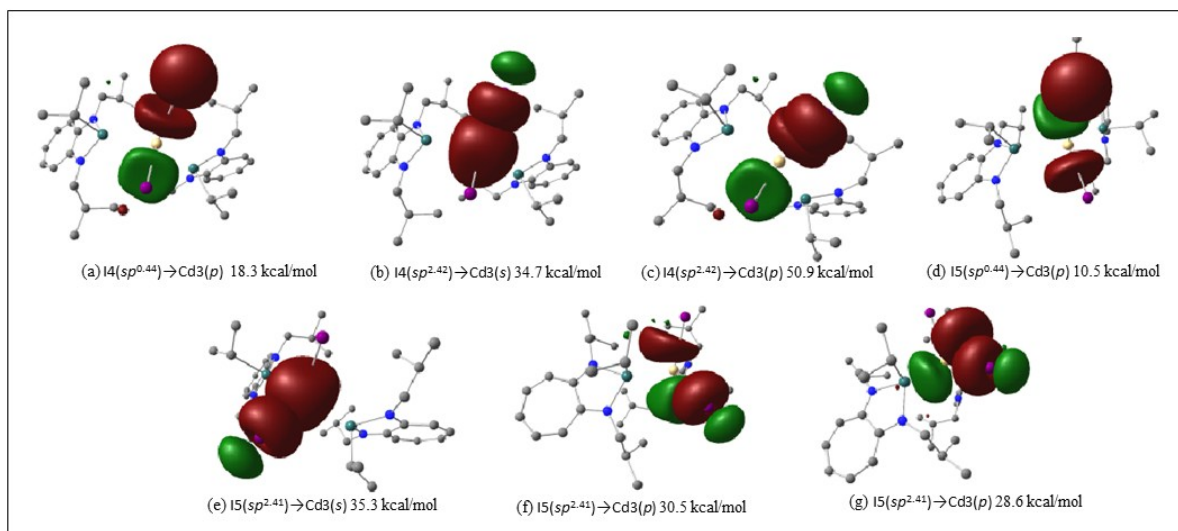

**Figure S3. NBO diagrams of compound 3.** Donor-acceptor interactions between I4/5→Cd3 atoms are shown with stabilization energies. Interaction threshold was chosen as 10 kcal/mol. Hydrogen atoms are omitted for clarity.

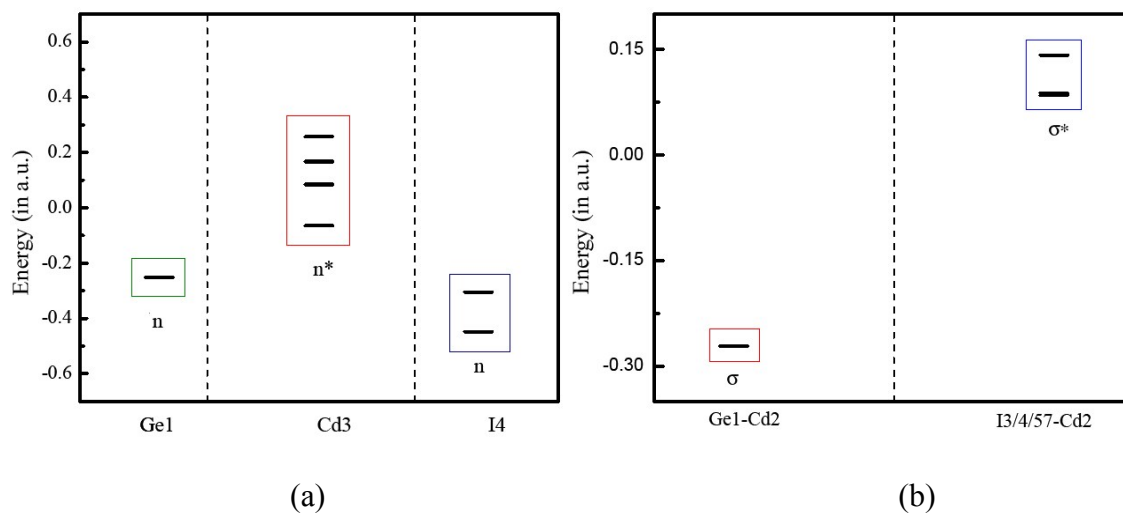

**Figure S4. Energy level diagrams for the donor-acceptor interactions in (a) compound 3 and (b) compound 7.** Same diagrams for the donor-acceptor interactions between (a) Ge2→Cd3 and I5→Cd3 in compound 3, and (b) Ge55-Cd56→I58/3/57-Cd56 in compound 7 can also be drawn.

**Table S5. NPA charges on germanium, cadmium, and iodine atoms in compounds 3 and 7.**

| <b>Compound 3</b> | <b>NPA charges (a.u.)</b> | <b>Compound 7</b> | <b>NPA charges (a.u.)</b> |
|-------------------|---------------------------|-------------------|---------------------------|
| Ge1/Ge2           | 1.21                      | Ge1/Ge55          | 1.20                      |
| Cd3               | 0.51                      | Cd2 /Cd56         | 0.62                      |
| I4/I5             | -0.57                     | I3/I57            | -0.48                     |
|                   |                           | I4/I58            | -0.53                     |

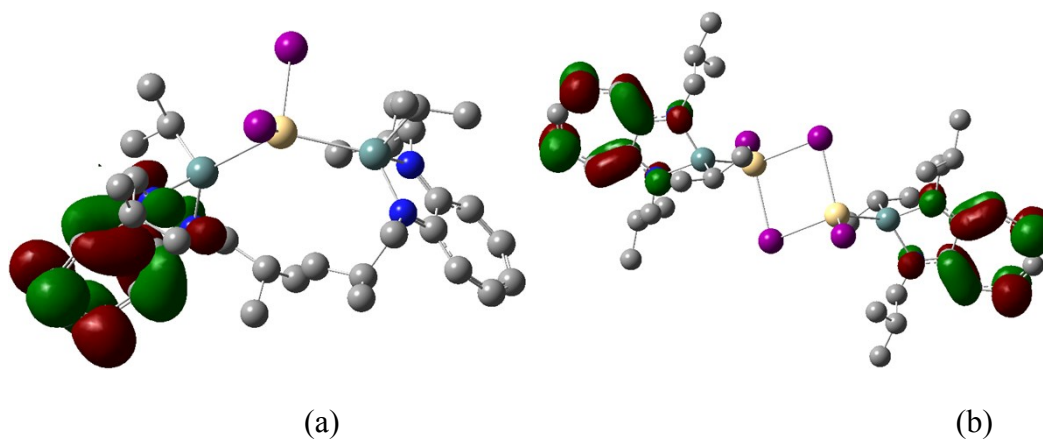

**Figure S5.** The LUMOs of (a) compound 3 and (b) compound 7. The isosurface value is 0.032 a.u.

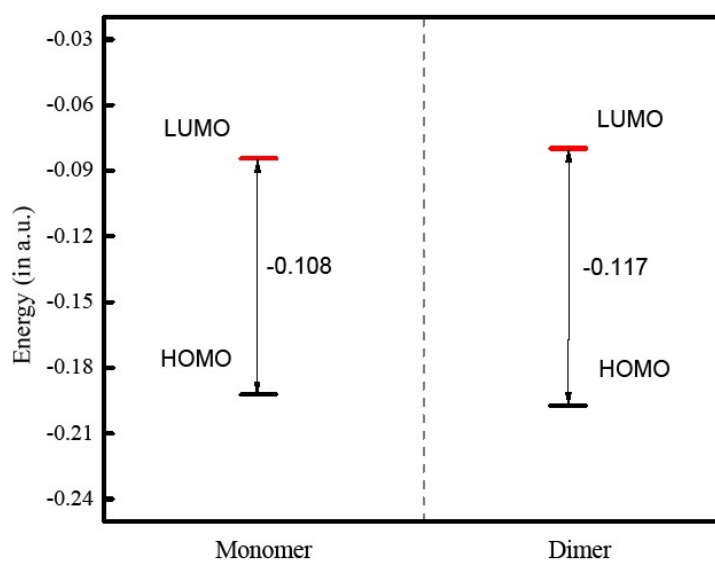

**Figure S6.** Energy level diagram that shows the HOMO and LUMO energies of compounds 3 (Monomer) and 7 (Dimer).

**Coordinates for the optimized geometries of:**

**Compound 3**

|    |            |            |            |
|----|------------|------------|------------|
| Ge | -2.6940410 | -0.5740520 | 0.3220450  |
| Ge | 2.3686060  | 0.1683400  | -0.8744630 |
| Cd | -0.0196150 | -1.3504800 | -0.2632120 |
| I  | 0.6634840  | -3.1586800 | 1.8775690  |
| I  | -0.6742590 | -2.4763000 | -2.8662090 |
| N  | -3.2874650 | 0.6308690  | 1.7670140  |
| N  | -3.7384970 | 0.7164960  | -0.7440130 |
| N  | 4.0046590  | 0.1232400  | 0.2247100  |
| N  | 2.7988530  | 2.1045670  | -0.8336780 |
| C  | -4.1436720 | 1.6027720  | 1.4116220  |
| C  | -4.7111820 | 2.4832920  | 2.3694600  |
| H  | -4.3791340 | 2.3107770  | 3.3851340  |
| C  | -5.6237840 | 3.5279110  | 2.2493470  |
| H  | -5.8607070 | 4.0226660  | 3.1896220  |
| C  | -6.2832370 | 4.0243270  | 1.1252130  |
| H  | -6.9668920 | 4.8545980  | 1.2758370  |
| C  | -6.1527140 | 3.5318450  | -0.1736970 |
| H  | -6.7676060 | 4.0230140  | -0.9258140 |
| C  | -5.3559060 | 2.5052570  | -0.6718100 |
| H  | -5.4687370 | 2.3440120  | -1.7359600 |
| C  | -4.4255570 | 1.6344030  | -0.0453250 |



|   |            |            |            |
|---|------------|------------|------------|
| C | -2.8974090 | 0.3776110  | 3.1597640  |
| H | -3.7955460 | 0.3666670  | 3.7924090  |
| H | -2.4825080 | -0.6354420 | 3.1998310  |
| C | -3.9289750 | 0.5012760  | -2.1863460 |
| H | -5.0045890 | 0.4260970  | -2.3999180 |
| H | -3.4952780 | -0.4755390 | -2.4271680 |
| C | -1.8482590 | 1.3455440  | 3.7586760  |
| H | -2.2304510 | 2.3710690  | 3.6701830  |
| C | -3.2872460 | 1.5491520  | -3.1275460 |
| H | -3.6798150 | 2.5412970  | -2.8692080 |
| C | -1.6715660 | 1.0279010  | 5.2522230  |
| H | -2.6154300 | 1.1206380  | 5.8025140  |
| H | -0.9486800 | 1.7105620  | 5.7112790  |
| H | -1.2983590 | 0.0064180  | 5.3941300  |
| C | -0.5073310 | 1.2752980  | 3.0166870  |
| H | -0.0732520 | 0.2707340  | 3.0799530  |
| H | 0.2096810  | 1.9787850  | 3.4539640  |
| H | -0.6195030 | 1.5287630  | 1.9579420  |
| C | -3.6983630 | 1.2332520  | -4.5747160 |
| H | -3.2769520 | 1.9702670  | -5.2667540 |
| H | -4.7878230 | 1.2431970  | -4.6991530 |
| H | -3.3321540 | 0.2452840  | -4.8774560 |
| C | -1.7607940 | 1.5921380  | -2.9855500 |

|   |            |            |            |
|---|------------|------------|------------|
| H | -1.4647930 | 1.8275030  | -1.9580610 |
| H | -1.3402790 | 2.3610120  | -3.6439930 |
| H | -1.3155260 | 0.6291930  | -3.2574180 |
| C | -4.0215450 | -2.1207550 | 0.4385200  |
| H | -3.8603080 | -2.6475340 | -0.5133930 |
| C | -5.4919920 | -1.6935480 | 0.5253670  |
| H | -6.1464750 | -2.5760470 | 0.5495890  |
| H | -5.8030310 | -1.0807430 | -0.3267890 |
| H | -5.6925900 | -1.1203280 | 1.4392150  |
| C | -3.6508770 | -3.0900990 | 1.5760010  |
| H | -3.8228400 | -2.6381600 | 2.5613650  |
| H | -2.6060820 | -3.4130840 | 1.5350450  |
| H | -4.2769110 | -3.9911270 | 1.5256200  |
| C | 4.7493760  | 1.2391480  | 0.1788930  |
| C | 6.1127600  | 1.2390320  | 0.5699720  |
| H | 6.5018960  | 0.2553620  | 0.8026520  |
| C | 7.0480040  | 2.2620330  | 0.6880760  |
| H | 8.0368290  | 1.9318850  | 1.0010470  |
| C | 6.9059730  | 3.6343070  | 0.4793330  |
| H | 7.7732580  | 4.2593110  | 0.6708510  |
| C | 5.7449070  | 4.2707760  | 0.0426540  |
| H | 5.8095820  | 5.3535880  | -0.0484800 |
| C | 4.5066650  | 3.7432960  | -0.3166770 |

|   |            |            |            |
|---|------------|------------|------------|
| H | 3.7905680  | 4.4937890  | -0.6234330 |
| C | 4.0159430  | 2.4137430  | -0.3527310 |
| C | 4.4403180  | -1.1049670 | 0.9082590  |
| H | 5.3520870  | -1.4975610 | 0.4336190  |
| H | 3.6580050  | -1.8519000 | 0.7429860  |
| C | 1.8898760  | 3.0812960  | -1.4374780 |
| H | 1.3917000  | 2.5826760  | -2.2781970 |
| H | 2.4533260  | 3.9126050  | -1.8766520 |
| C | 4.6663430  | -0.9823350 | 2.4375950  |
| H | 5.5435900  | -0.3481790 | 2.6153210  |
| C | 0.7875680  | 3.6262060  | -0.4942850 |
| H | 0.1564140  | 2.7700030  | -0.2186190 |
| C | 4.9784480  | -2.3808010 | 2.9958330  |
| H | 5.2122220  | -2.3242620 | 4.0644740  |
| H | 5.8393540  | -2.8354910 | 2.4906130  |
| H | 4.1193410  | -3.0498220 | 2.8746100  |
| C | 3.4751360  | -0.3427110 | 3.1638390  |
| H | 3.2732530  | 0.6685630  | 2.7952610  |
| H | 3.6852400  | -0.2699430 | 4.2370590  |
| H | 2.5692750  | -0.9437750 | 3.0367890  |
| C | -0.0779200 | 4.6375190  | -1.2628160 |
| H | 0.5079590  | 5.5250940  | -1.5337950 |
| H | -0.9206100 | 4.9732200  | -0.6491770 |

|   |            |            |            |
|---|------------|------------|------------|
| H | -0.4853280 | 4.2097100  | -2.1841260 |
| C | 1.3208210  | 4.2448730  | 0.8053610  |
| H | 1.9616690  | 3.5513080  | 1.3570620  |
| H | 0.4858460  | 4.5176430  | 1.4599260  |
| H | 1.8932920  | 5.1594770  | 0.6099970  |
| C | 3.0867060  | -0.3639600 | -2.7086730 |
| H | 2.1991330  | -0.3202310 | -3.3558240 |
| C | 3.5478280  | -1.8332080 | -2.6696730 |
| H | 3.8125470  | -2.1759840 | -3.6786180 |
| H | 2.7661620  | -2.5066460 | -2.3026160 |
| H | 4.4378240  | -1.9599210 | -2.0405020 |
| C | 4.1735520  | 0.5484200  | -3.2894000 |
| H | 5.0772740  | 0.5525380  | -2.6675820 |
| H | 3.8388870  | 1.5859370  | -3.3948080 |
| H | 4.4743240  | 0.1984960  | -4.2869700 |

### Compound 7

|    |             |            |            |
|----|-------------|------------|------------|
| Ge | -3.8170080  | -0.0512940 | -0.7640180 |
| Cd | -1.7458400  | 0.2450080  | 1.0837310  |
| I  | 0.1513900   | 2.2273690  | -0.2072530 |
| I  | -1.9800540  | 0.6013460  | 3.8540520  |
| N  | -5.2239800  | -1.3635740 | -0.4079740 |
| N  | -5.3576930  | 1.1561540  | -0.7948160 |
| C  | -6.4842040  | -0.9021240 | -0.4984630 |
| C  | -7.5991180  | -1.7720680 | -0.4218620 |
| H  | -7.3406010  | -2.8154930 | -0.2967300 |
| C  | -8.9681570  | -1.5353340 | -0.4757730 |
| H  | -9.5790070  | -2.4310090 | -0.3809740 |
| C  | -9.6701070  | -0.3420650 | -0.6314590 |
| H  | -10.7542960 | -0.4005960 | -0.6340150 |
| C  | -9.0999130  | 0.9176490  | -0.7967020 |
| H  | -9.8027020  | 1.7390980  | -0.9218850 |
| C  | -7.7634810  | 1.3013020  | -0.8357130 |
| H  | -7.6185080  | 2.3623430  | -0.9921610 |
| C  | -6.5626730  | 0.5618890  | -0.7109750 |
| C  | -4.8999390  | -2.7864850 | -0.2340000 |
| H  | -3.8416160  | -2.9085090 | -0.4912230 |
| H  | -5.4621100  | -3.3792120 | -0.9685650 |
| C  | -5.1908670  | 2.5995600  | -1.0117220 |

|   |            |            |            |
|---|------------|------------|------------|
| H | -5.8272270 | 2.9171140  | -1.8487060 |
| H | -4.1581070 | 2.7580440  | -1.3401900 |
| C | -5.1204820 | -3.3645690 | 1.1840970  |
| H | -6.1731460 | -3.2170560 | 1.4580340  |
| C | -5.4474390 | 3.5040750  | 0.2170730  |
| H | -6.4628190 | 3.3081180  | 0.5851870  |
| C | -4.8424090 | -4.8750370 | 1.1506350  |
| H | -3.8006280 | -5.0754290 | 0.8743420  |
| H | -5.4864200 | -5.3937440 | 0.4310680  |
| H | -5.0139650 | -5.3208360 | 2.1351850  |
| C | -4.2578000 | -2.6634980 | 2.2387680  |
| H | -4.4479460 | -3.0800380 | 3.2328930  |
| H | -4.4639260 | -1.5911250 | 2.2923340  |
| H | -3.1904150 | -2.7955340 | 2.0278320  |
| C | -5.3741490 | 4.9733520  | -0.2255530 |
| H | -5.5726450 | 5.6414070  | 0.6180620  |
| H | -6.1032270 | 5.2004890  | -1.0118840 |
| H | -4.3775510 | 5.2176760  | -0.6119810 |
| C | -4.4684390 | 3.2194520  | 1.3616810  |
| H | -3.4329430 | 3.4036490  | 1.0511370  |
| H | -4.5385790 | 2.1879580  | 1.7169380  |
| H | -4.6733480 | 3.8706020  | 2.2171440  |
| C | -3.3852170 | -0.3605930 | -2.7234560 |

|    |            |            |            |
|----|------------|------------|------------|
| H  | -2.6433470 | -1.1709150 | -2.6929630 |
| C  | -4.5825450 | -0.8140540 | -3.5661040 |
| H  | -5.3724930 | -0.0536260 | -3.5857530 |
| H  | -5.0255340 | -1.7444680 | -3.1974000 |
| H  | -4.2742650 | -0.9864900 | -4.6053580 |
| C  | -2.7018600 | 0.8768880  | -3.3323480 |
| H  | -2.3222590 | 0.6462560  | -4.3347590 |
| H  | -1.8504110 | 1.2253710  | -2.7396930 |
| H  | -3.4057550 | 1.7117100  | -3.4375770 |
| Ge | 3.8169720  | 0.0512900  | 0.7640190  |
| Cd | 1.7458550  | -0.2450270 | -1.0837860 |
| I  | -0.1514020 | -2.2273870 | 0.2071640  |
| I  | 1.9801330  | -0.6013640 | -3.8541010 |
| N  | 5.2239390  | 1.3635880  | 0.4080170  |
| N  | 5.3576710  | -1.1561400 | 0.7948590  |
| C  | 6.4841650  | 0.9021520  | 0.4985450  |
| C  | 7.5990690  | 1.7721130  | 0.4219890  |
| H  | 7.3405410  | 2.8155340  | 0.2968510  |
| C  | 8.9681090  | 1.5353990  | 0.4759540  |
| H  | 9.5789500  | 2.4310820  | 0.3811800  |
| C  | 9.6700700  | 0.3421400  | 0.6316670  |
| H  | 10.7542580 | 0.4006870  | 0.6342660  |
| C  | 9.0998880  | -0.9175830 | 0.7968870  |

|   |           |            |            |
|---|-----------|------------|------------|
| H | 9.8026840 | -1.7390220 | 0.9220970  |
| C | 7.7634610 | -1.3012550 | 0.8358450  |
| H | 7.6184960 | -2.3622980 | 0.9922870  |
| C | 6.5626470 | -0.5618600 | 0.7110590  |
| C | 4.8998880 | 2.7864960  | 0.2340380  |
| H | 3.8415560 | 2.9085090  | 0.4912300  |
| H | 5.4620320 | 3.3792240  | 0.9686220  |
| C | 5.1908570 | -2.5995490 | 1.0117610  |
| H | 5.8271860 | -2.9170890 | 1.8487740  |
| H | 4.1580860 | -2.7580500 | 1.3401870  |
| C | 5.1204690 | 3.3645900  | -1.1840490 |
| H | 6.1731430 | 3.2170900  | -1.4579550 |
| C | 5.4475000 | -3.5040680 | -0.2170180 |
| H | 6.4628900 | -3.3080880 | -0.5850930 |
| C | 4.8423820 | 4.8750550  | -1.1505860 |
| H | 3.8005900 | 5.0754360  | -0.8743260 |
| H | 5.4863640 | 5.3937620  | -0.4309930 |
| H | 5.0139670 | 5.3208630  | -2.1351260 |
| C | 4.2578270 | 2.6635190  | -2.2387530 |
| H | 4.4480020 | 3.0800690  | -3.2328690 |
| H | 4.4639640 | 1.5911490  | -2.2923200 |
| H | 3.1904340 | 2.7955450  | -2.0278510 |
| C | 5.3742320 | -4.9733430 | 0.2256160  |



|   |           |            |            |
|---|-----------|------------|------------|
| H | 5.5727790 | -5.6413990 | -0.6179860 |
| H | 6.1032840 | -5.2004540 | 1.0119790  |
| H | 4.3776240 | -5.2176900 | 0.6120060  |
| C | 4.4685390 | -3.2194820 | -1.3616680 |
| H | 3.4330360 | -3.4037020 | -1.0511650 |
| H | 4.5386670 | -2.1879900 | -1.7169340 |
| H | 4.6734990 | -3.8706350 | -2.2171170 |
| C | 3.3851190 | 0.3605760  | 2.7234440  |
| H | 2.6432180 | 1.1708700  | 2.6929310  |
| C | 4.5824070 | 0.8140840  | 3.5661230  |
| H | 5.3723830 | 0.0536850  | 3.5857950  |
| H | 5.0253710 | 1.7445140  | 3.1974310  |
| H | 4.2740920 | 0.9865100  | 4.6053690  |
| C | 2.7017940 | -0.8769300 | 3.3323190  |
| H | 2.3221580 | -0.6463110 | 4.3347200  |
| H | 1.8503740 | -1.2254470 | 2.7396440  |
| H | 3.4057190 | -1.7117250 | 3.4375670  |

**References:**

- S1. M. Frisch et al., Gaussian 09, Revision D. 01; Gaussian, Inc.: Wallingford, CT, 2013.
- S2. E. D. Glendening, A. E. Reed, J. E. Carpenter and F. Weinhold, NBO Version 3.1.
- S3. R. Dennington, T. Keith and J. Millam, Semichem Inc: Shawnee Mission, 2009.
